# Supplementary material for: Enhancement of the efficiency and thermal stability of the double perovskite Cs2AgInCl6 single crystal by Sc substitution
Source: Royal Society of Chemistry journal article supplement (doi:10.1039/d2ma00139j), 2022-01-01
Supplement: d2ma00139j1.pdf [file d2ma00139j1.pdf]

## Supporting information

### **Enhancement of efficiency and thermal stability of the double perovskite $\text{Cs}_2\text{AgInCl}_6$ single crystal by Sc substitution**

Liyan Chen<sup>1,2</sup>, Hangjie Jiang<sup>1,3</sup>, Zhaohua Luo<sup>1,\*</sup>, Guoqiang Liu<sup>1</sup>, Xianhui Wu<sup>1,3</sup>, Yongfu Liu<sup>1</sup>, Peng Sun<sup>1</sup>, Jun Jiang<sup>1,\*</sup>

1. Ningbo Institute of Materials Technology and Engineering Chinese Academy of Sciences Ningbo 315201, P. R. China

2. Nano Science and Technology Institute, University of Science and Technology of China, Suzhou 215123, P. R. China

3. School of Material Science and Engineering, Jiangxi University of Science and Technology, Ganzhou, 341000, P. R. China

E-mail: luozhaohua@nimte.ac.cn, jjun@nimte.ac.cn

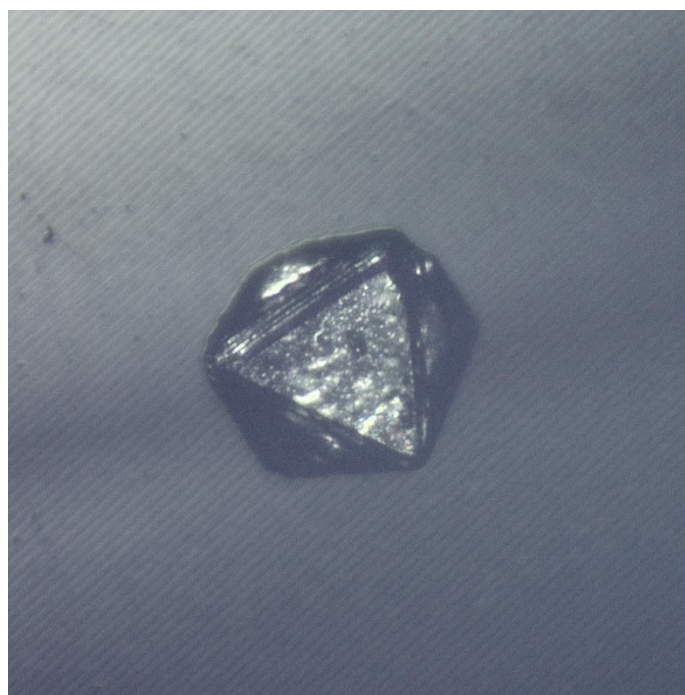

Fig. S1 The picture of  $\text{Cs}_2\text{AgInCl}_6$  crystal

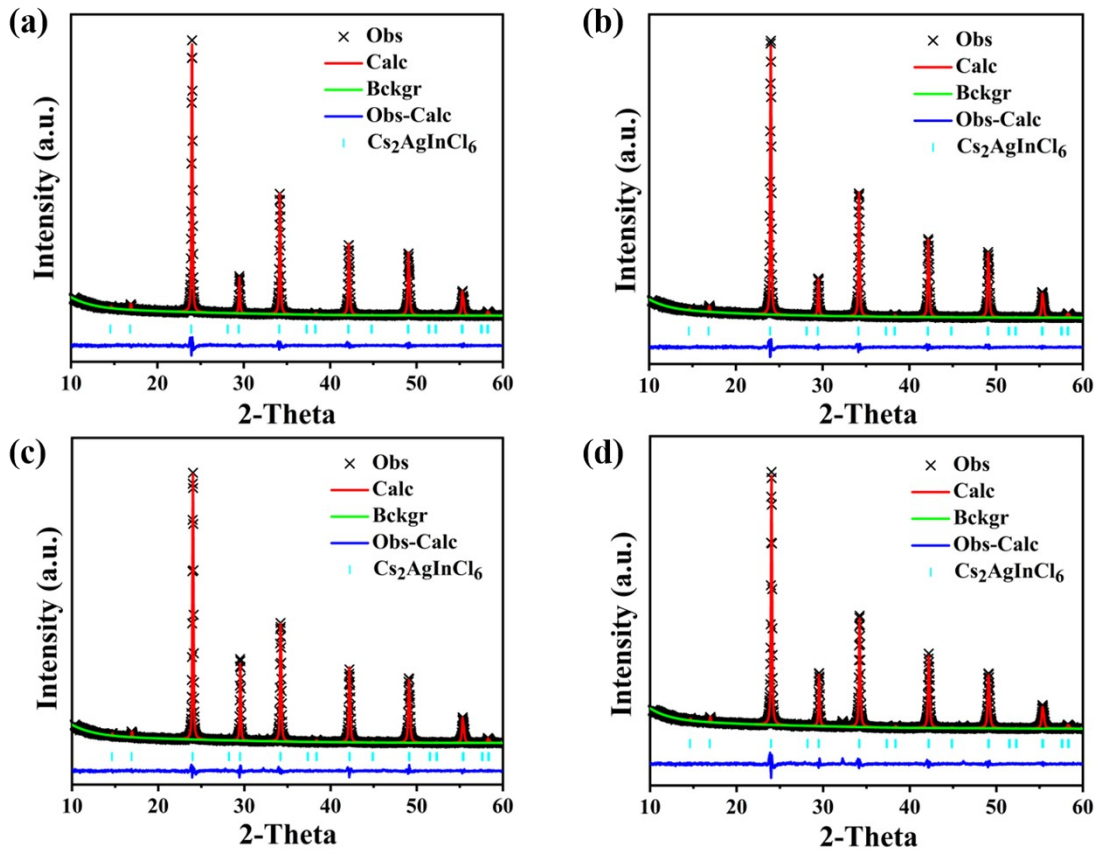

Fig. S2 Rietveld refinement of XRD patterns of (a)  $\text{Cs}_2\text{AgInCl}_6$ , (b)  $\text{Cs}_2\text{AgIn}_{0.8}\text{Sc}_{0.2}\text{Cl}_6$ , (c)  $\text{Cs}_2\text{AgIn}_{0.6}\text{Sc}_{0.4}\text{Cl}_6$  and (d)  $\text{Cs}_2\text{AgIn}_{0.4}\text{Sc}_{0.6}\text{Cl}_6$ .

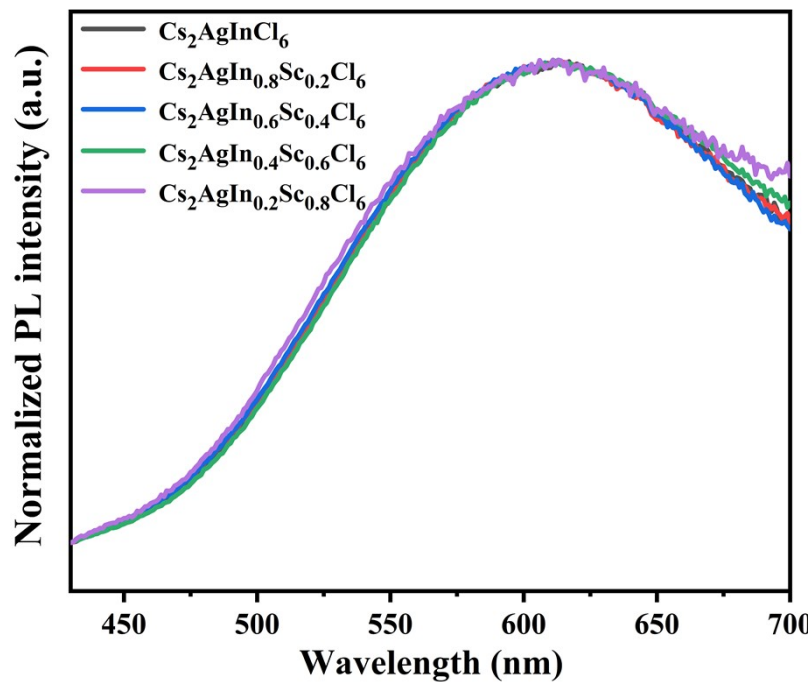

Fig. S3 Normalized PL spectra of  $\text{Cs}_2\text{AgIn}_{1-x}\text{Sc}_x\text{Cl}_6$  ( $x = 0, 0.2, 0.4, 0.6$  and  $0.8$ ) SCs.

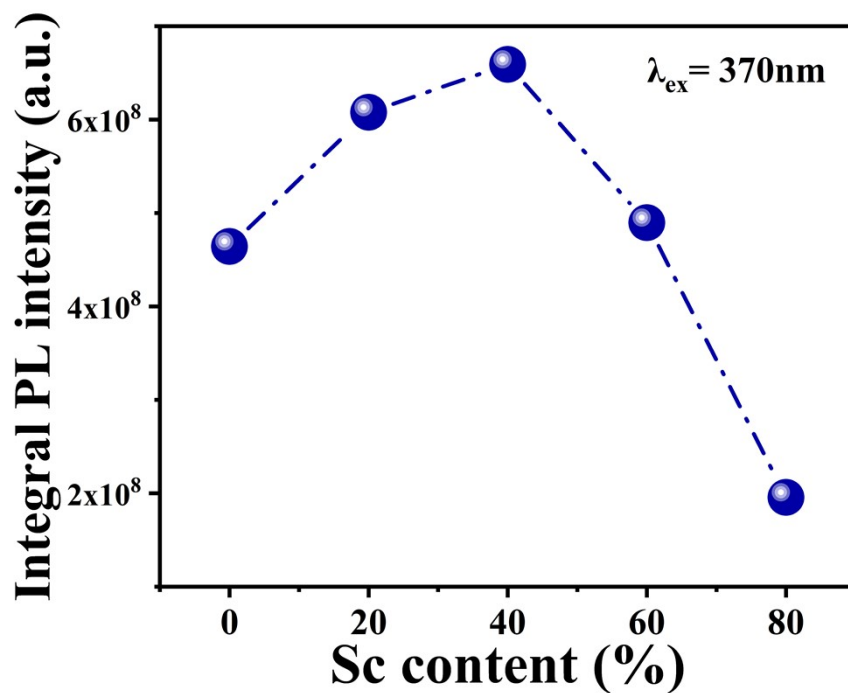

Fig. S4 The integral intensity of PL spectra of  $\text{Cs}_2\text{AgIn}_{1-x}\text{Sc}_x\text{Cl}_6$  ( $x = 0, 0.2, 0.4, 0.6$  and  $0.8$ ) single crystals.

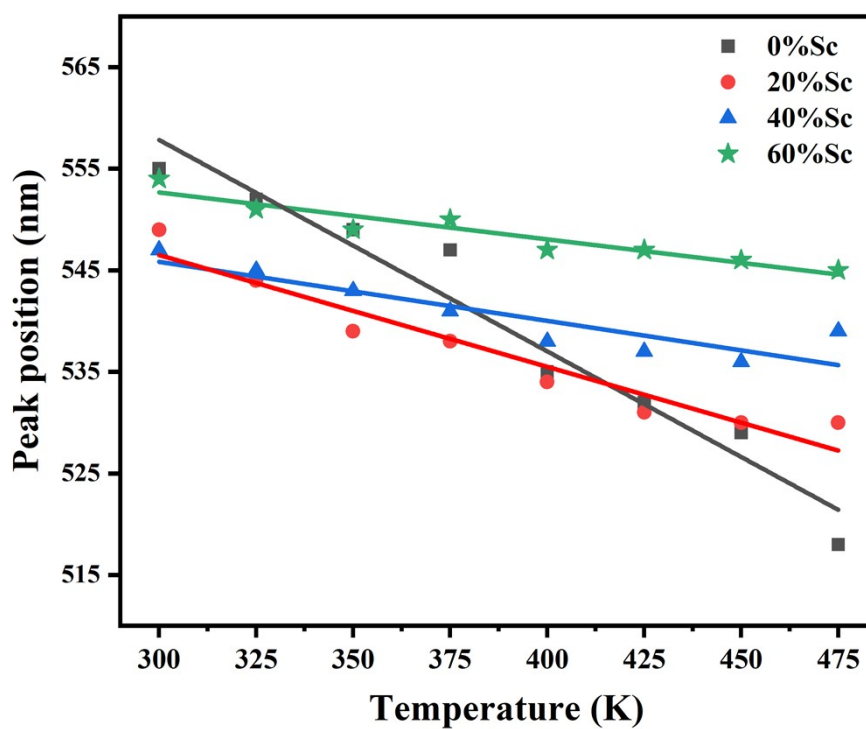

Fig. S5 Relationship between the peak position and the temperature of  $\text{Cs}_2\text{AgIn}_{1-x}\text{Sc}_x\text{Cl}_6$  ( $x = 0, 0.2, 0.4$  and  $0.6$ ) SCs.

Table S1 The refined crystal structure of  $\text{Cs}_2\text{AgIn}_{1-x}\text{Sc}_x\text{Cl}_6$  ( $x = 0, 0.2, 0.4$  and  $0.6$ ) at room temperature.

| Samples                                                  | Space group  | Cell parameter, $a(\text{\AA})$ | Z | Occupancy of Sc (%) | $R_p$ (%) | $R_{wp}$ (%) | $\chi^2$ |
|----------------------------------------------------------|--------------|---------------------------------|---|---------------------|-----------|--------------|----------|
| $\text{Cs}_2\text{AgInCl}_6$                             | $Fm\bar{3}m$ | 10.5019                         | 4 | 0                   | 4.76      | 6.01         | 1.84     |
| $\text{Cs}_2\text{AgIn}_{0.8}\text{Sc}_{0.2}\text{Cl}_6$ | $Fm\bar{3}m$ | 10.5010                         | 4 | 3.88                | 4.24      | 5.39         | 1.68     |
| $\text{Cs}_2\text{AgIn}_{0.6}\text{Sc}_{0.4}\text{Cl}_6$ | $Fm\bar{3}m$ | 10.4955                         | 4 | 5.21                | 4.36      | 5.55         | 1.81     |
| $\text{Cs}_2\text{AgIn}_{0.4}\text{Sc}_{0.6}\text{Cl}_6$ | $Fm\bar{3}m$ | 10.4947                         | 4 | 5.44                | 5.65      | 7.361        | 2.26     |
